# Supplementary material for: Microbial community variations in adult Hyalomma dromedarii ticks from single locations in Saudi Arabia and Tunisia
Source: Front Microbiol. 2025 Feb 11;16:1543560. doi: 10.3389/fmicb.2025.1543560 (PMC11850374; doi:10.3389/fmicb.2025.1543560)
Supplement: Supplementary Table 3 — The list of shared and unique pathways of functional profile analysis between ML and FM. [file Table_3.xlsx]

## Sheet: Supplementary table S3
Pathway	Condition
PWY-5499	ML
BENZCOA-PWY	FM
CENTBENZCOA-PWY	FM
ILEUDEG-PWY	FM
PWY-3081	FM
PWY-5184	FM
PWY-6145	FM
PWY-6148	FM
PWY-6565	FM
PWY-6830	FM
PWY-6942	FM
PWY-6975	FM
PWY-6977	FM
PWY-7106	FM
PWY-7110	FM
PWY-7316	FM
PWY-7398	FM
1CMET2-PWY	Shared
3-HYDROXYPHENYLACETATE-DEGRADATION-PWY	Shared
AEROBACTINSYN-PWY	Shared
ALL-CHORISMATE-PWY	Shared
ANAEROFRUCAT-PWY	Shared
ANAGLYCOLYSIS-PWY	Shared
ARG㳢_xD800_숍SYN	Shared
ARGDEG-PWY	Shared
ARGORNPROST-PWY	Shared
ARGSYN-PWY	Shared
ARGSYNBSUB-PWY	Shared
ARO-PWY	Shared
ASPASN-PWY	Shared
AST-PWY	Shared
BIOTIN-BIOSYNTHESIS-PWY	Shared
BRANCHED-CHAIN-AA-SYN-PWY	Shared
CALVIN-PWY	Shared
CATECHOL-ORTHO-CLEAVAGE-PWY	Shared
CENTFERM-PWY	Shared
CHLOROPHYLL-SYN	Shared
COA-PWY	Shared
COBALSYN-PWY	Shared
CODH-PWY	Shared
COLANSYN-PWY	Shared
COMPLETE-ARO-PWY	Shared
CRNFORCAT-PWY	Shared
DAPLYSINESYN-PWY	Shared
DENITRIFICATION-PWY	Shared
DENOVOPURINE2-PWY	Shared
DHGLUCONATE-PYR-CAT-PWY	Shared
DTDPRHAMSYN-PWY	Shared
ECASYN-PWY	Shared
ENTBACSYN-PWY	Shared
FAO-PWY	Shared
FASYN-ELONG-PWY	Shared
FASYN-INITIAL-PWY	Shared
FERMENTATION-PWY	Shared
FOLSYN-PWY	Shared
FUC-RHAMCAT-PWY	Shared
FUCCAT-PWY	Shared
GALACT-GLUCUROCAT-PWY	Shared
GALACTARDEG-PWY	Shared
GALACTUROCAT-PWY	Shared
GALLATE-DEGRADATION-I-PWY	Shared
GALLATE-DEGRADATION-II-PWY	Shared
GLCMANNANAUT-PWY	Shared
GLUCARDEG-PWY	Shared
GLUCARGALACTSUPER-PWY	Shared
GLUCONEO-PWY	Shared
GLUCOSE1PMETAB-PWY	Shared
GLUCUROCAT-PWY	Shared
GLUTORN-PWY	Shared
GLYCOCAT-PWY	Shared
GLYCOGENSYNTH-PWY	Shared
GLYCOL-GLYOXDEG-PWY	Shared
GLYCOLYSIS	Shared
GLYCOLYSIS-E-D	Shared
GLYCOLYSIS-TCA-GLYOX-BYPASS	Shared
GLYOXYLATE-BYPASS	Shared
GOLPDLCAT-PWY	Shared
HCAMHPDEG-PWY	Shared
HEME-BIOSYNTHESIS-II	Shared
HEMESYN2-PWY	Shared
HEXITOLDEGSUPER-PWY	Shared
HISDEG-PWY	Shared
HISTSYN-PWY	Shared
HOMOSER-METSYN-PWY	Shared
HSERMETANA-PWY	Shared
ILEUSYN-PWY	Shared
KDO-NAGLIPASYN-PWY	Shared
KETOGLUCONMET-PWY	Shared
LACTOSECAT-PWY	Shared
LEU-DEG2-PWY	Shared
LIPASYN-PWY	Shared
LPSSYN-PWY	Shared
MET-SAM-PWY	Shared
METH-ACETATE-PWY	Shared
METHANOGENESIS-PWY	Shared
METHGLYUT-PWY	Shared
METHYLGALLATE-DEGRADATION-PWY	Shared
NAD-BIOSYNTHESIS-II	Shared
NADSYN-PWY	Shared
NAGLIPASYN-PWY	Shared
NONMEVIPP-PWY	Shared
NONOXIPENT-PWY	Shared
OANTIGEN-PWY	Shared
ORNARGDEG-PWY	Shared
ORNDEG-PWY	Shared
P101-PWY	Shared
P105-PWY	Shared
P108-PWY	Shared
P122-PWY	Shared
P124-PWY	Shared
P125-PWY	Shared
P161-PWY	Shared
P162-PWY	Shared
P163-PWY	Shared
P164-PWY	Shared
P184-PWY	Shared
P221-PWY	Shared
P23-PWY	Shared
P241-PWY	Shared
P261-PWY	Shared
P281-PWY	Shared
P341-PWY	Shared
P381-PWY	Shared
P4-PWY	Shared
P42-PWY	Shared
P441-PWY	Shared
P461-PWY	Shared
P562-PWY	Shared
P621-PWY	Shared
PANTO-PWY	Shared
PANTOSYN-PWY	Shared
PENTOSE-P-PWY	Shared
PEPTIDOGLYCANSYN-PWY	Shared
PHOSLIPSYN-PWY	Shared
POLYAMINSYN3-PWY	Shared
POLYAMSYN-PWY	Shared
POLYISOPRENSYN-PWY	Shared
PPGPPMET-PWY	Shared
PROTOCATECHUATE-ORTHO-CLEAVAGE-PWY	Shared
PRPP-PWY	Shared
PWY-1269	Shared
PWY-1361	Shared
PWY-1422	Shared
PWY-1501	Shared
PWY-1541	Shared
PWY-1622	Shared
PWY-181	Shared
PWY-1861	Shared
PWY-1882	Shared
PWY-2941	Shared
PWY-2942	Shared
PWY-3001	Shared
PWY-3661	Shared
PWY-3781	Shared
PWY-3801	Shared
PWY-3941	Shared
PWY-4361	Shared
PWY-4722	Shared
PWY-4984	Shared
PWY-5005	Shared
PWY-5022	Shared
PWY-5028	Shared
PWY-5088	Shared
PWY-5097	Shared
PWY-5100	Shared
PWY-5101	Shared
PWY-5103	Shared
PWY-5104	Shared
PWY-5121	Shared
PWY-5154	Shared
PWY-5177	Shared
PWY-5178	Shared
PWY-5179	Shared
PWY-5180	Shared
PWY-5181	Shared
PWY-5182	Shared
PWY-5183	Shared
PWY-5188	Shared
PWY-5189	Shared
PWY-5198	Shared
PWY-5265	Shared
PWY-5266	Shared
PWY-5273	Shared
PWY-5304	Shared
PWY-5345	Shared
PWY-5347	Shared
PWY-5384	Shared
PWY-5392	Shared
PWY-5415	Shared
PWY-5417	Shared
PWY-5419	Shared
PWY-5420	Shared
PWY-5427	Shared
PWY-5430	Shared
PWY-5431	Shared
PWY-5484	Shared
PWY-5505	Shared
PWY-5507	Shared
PWY-5509	Shared
PWY-5529	Shared
PWY-5531	Shared
PWY-5532	Shared
PWY-5647	Shared
PWY-5651	Shared
PWY-5654	Shared
PWY-5655	Shared
PWY-5656	Shared
PWY-5659	Shared
PWY-5667	Shared
PWY-5676	Shared
PWY-5677	Shared
PWY-5686	Shared
PWY-5695	Shared
PWY-5705	Shared
PWY-5741	Shared
PWY-5743	Shared
PWY-5744	Shared
PWY-5747	Shared
PWY-5837	Shared
PWY-5838	Shared
PWY-5840	Shared
PWY-5845	Shared
PWY-5850	Shared
PWY-5855	Shared
PWY-5856	Shared
PWY-5857	Shared
PWY-5860	Shared
PWY-5861	Shared
PWY-5862	Shared
PWY-5863	Shared
PWY-5896	Shared
PWY-5897	Shared
PWY-5898	Shared
PWY-5899	Shared
PWY-5910	Shared
PWY-5913	Shared
PWY-5918	Shared
PWY-5920	Shared
PWY-5941	Shared
PWY-5971	Shared
PWY-5973	Shared
PWY-5989	Shared
PWY-6071	Shared
PWY-6107	Shared
PWY-6121	Shared
PWY-6122	Shared
PWY-6123	Shared
PWY-6125	Shared
PWY-6126	Shared
PWY-6147	Shared
PWY-6151	Shared
PWY-6163	Shared
PWY-6165	Shared
PWY-6167	Shared
PWY-6174	Shared
PWY-6182	Shared
PWY-6185	Shared
PWY-621	Shared
PWY-6210	Shared
PWY-622	Shared
PWY-6263	Shared
PWY-6269	Shared
PWY-6277	Shared
PWY-6282	Shared
PWY-6317	Shared
PWY-6338	Shared
PWY-6339	Shared
PWY-6349	Shared
PWY-6350	Shared
PWY-6353	Shared
PWY-6383	Shared
PWY-6385	Shared
PWY-6386	Shared
PWY-6387	Shared
PWY-6396	Shared
PWY-6397	Shared
PWY-6404	Shared
PWY-6467	Shared
PWY-6470	Shared
PWY-6471	Shared
PWY-6478	Shared
PWY-6505	Shared
PWY-6507	Shared
PWY-6519	Shared
PWY-6545	Shared
PWY-6562	Shared
PWY-6572	Shared
PWY-6581	Shared
PWY-6588	Shared
PWY-6590	Shared
PWY-6608	Shared
PWY-6609	Shared
PWY-6612	Shared
PWY-6628	Shared
PWY-6629	Shared
PWY-6630	Shared
PWY-6641	Shared
PWY-6654	Shared
PWY-6690	Shared
PWY-6700	Shared
PWY-6703	Shared
PWY-6708	Shared
PWY-6713	Shared
PWY-6728	Shared
PWY-6731	Shared
PWY-6737	Shared
PWY-6749	Shared
PWY-6876	Shared
PWY-6891	Shared
PWY-6892	Shared
PWY-6895	Shared
PWY-6897	Shared
PWY-6901	Shared
PWY-6906	Shared
PWY-6944	Shared
PWY-6948	Shared
PWY-6956	Shared
PWY-6957	Shared
PWY-6969	Shared
PWY-6992	Shared
PWY-7003	Shared
PWY-7007	Shared
PWY-7013	Shared
PWY-7024	Shared
PWY-7046	Shared
PWY-7084	Shared
PWY-7090	Shared
PWY-7094	Shared
PWY-7097	Shared
PWY-7098	Shared
PWY-7111	Shared
PWY-7159	Shared
PWY-7184	Shared
PWY-7185	Shared
PWY-7187	Shared
PWY-7196	Shared
PWY-7197	Shared
PWY-7198	Shared
PWY-7199	Shared
PWY-7200	Shared
PWY-7208	Shared
PWY-7210	Shared
PWY-7211	Shared
PWY-7219	Shared
PWY-722	Shared
PWY-7220	Shared
PWY-7221	Shared
PWY-7222	Shared
PWY-7228	Shared
PWY-7229	Shared
PWY-7234	Shared
PWY-7237	Shared
PWY-7242	Shared
PWY-7254	Shared
PWY-7255	Shared
PWY-7286	Shared
PWY-7295	Shared
PWY-7315	Shared
PWY-7323	Shared
PWY-7328	Shared
PWY-7332	Shared
PWY-7347	Shared
PWY-7371	Shared
PWY-7373	Shared
PWY-7374	Shared
PWY-7376	Shared
PWY-7377	Shared
PWY-7385	Shared
PWY-7391	Shared
PWY-7392	Shared
PWY-7400	Shared
PWY-7431	Shared
PWY-7446	Shared
PWY-7456	Shared
PWY-7527	Shared
PWY-7539	Shared
PWY-7560	Shared
PWY-7616	Shared
PWY-7644	Shared
PWY-7663	Shared
PWY-7664	Shared
PWY-841	Shared
PWY-922	Shared
PWY0-1061	Shared
PWY0-1241	Shared
PWY0-1261	Shared
PWY0-1277	Shared
PWY0-1296	Shared
PWY0-1297	Shared
PWY0-1298	Shared
PWY0-1319	Shared
PWY0-1338	Shared
PWY0-1415	Shared
PWY0-1479	Shared
PWY0-1533	Shared
PWY0-1586	Shared
PWY0-162	Shared
PWY0-166	Shared
PWY0-321	Shared
PWY0-41	Shared
PWY0-42	Shared
PWY0-781	Shared
PWY0-845	Shared
PWY0-862	Shared
PWY1G-0	Shared
PWY490-3	Shared
PWY4FS-7	Shared
PWY4FS-8	Shared
PWY5F9-12	Shared
PWYG-321	Shared
PYRIDNUCSAL-PWY	Shared
PYRIDNUCSYN-PWY	Shared
PYRIDOXSYN-PWY	Shared
REDCITCYC	Shared
RHAMCAT-PWY	Shared
RIBOSYN2-PWY	Shared
RUMP-PWY	Shared
SALVADEHYPOX-PWY	Shared
SER-GLYSYN-PWY	Shared
SO4ASSIM-PWY	Shared
SUCSYN-PWY	Shared
SULFATE-CYS-PWY	Shared
TCA	Shared
TCA-GLYOX-BYPASS	Shared
TEICHOICACID-PWY	Shared
THISYN-PWY	Shared
THREOCAT-PWY	Shared
THRESYN-PWY	Shared
TRNA-CHARGING-PWY	Shared
TRPSYN-PWY	Shared
TYRFUMCAT-PWY	Shared
UBISYN-PWY	Shared
UDPNAGSYN-PWY	Shared
VALDEG-PWY	Shared
VALSYN-PWY	Shared
